# Supplementary material
Source: publisher figshare collection journal article supplement (https://karger.figshare.com/ndownloader/files/8712829)
Supplement: Supplementary file 1 [file 8712829]

**Diagnostic yield and safety of electromagnetic navigation bronchoscopy for  
lung nodules: a systematic review and meta-analysis**

Gregoire Gex, Jacques A. Pralong, Christophe Combescure, Luis Seijo, Thierry  
Rochat, Paola M. Soccà

ONLINE DATA SUPPLEMENT

## **METHODS**

### **Data sources**

A literature search was performed in order to identify all published studies reporting diagnostic yields of ENB for peripheral lung nodules. MEDLINE and EMBASE databases were searched in March 2012 using a predefined search strategy combining three groups of subjects with the Boolean operator “AND”: 1/ bronchoscopy and synonyms; 2/ guidance OR navigation; 3/ electromagnetism. All terms were exploded. Because search strategies for identifying trials reporting diagnostic accuracy are poorly sensitive,[1,2] no corresponding terms were used to select these studies. We restricted our search to trials published after 2000 because electromagnetic navigation bronchoscopy was first described in 2003. No restriction of study design, population or language was applied. For EMBASE database, the following search strategy was applied: “guid\* OR navigat\* AND ('bronchoscopy'/syn OR endoscop\* NEAR/5 (lung OR pulmon\* OR thora\* OR bronchi\*) OR fibroscop\* NEAR/5 (lung OR pulmon\* OR thora\* OR bronchi)) AND electromagneti\* AND [2000-2012]/py”. Reference lists of retrieved papers were independently hand-searched by two investigators for additional articles.

### **Statistical analysis**

The aforementioned outcomes were pooled by using the inverse-variance method with random effects on the logit transformed proportions.[3] A continuity correction was applied to studies with 0% or 100% of events (a count of 0.5 was added to the number of events and a count of 1 to the sample size). Sensitivity analyses were conducted by removing the studies

one-by-one to check the robustness of the results in regard of each study. The presence of between-study heterogeneity was assessed by using the indicator  $I^2$ . [4] When the  $I^2$  indicated the presence of heterogeneity ( $>25\%$ ) and when the number of studies with available data was at least 10, potential heterogeneity factors were analyzed for performance outcomes by meta-regressions or Cochran tests on the between-strata heterogeneity. When one of the strata contained less than five studies, or if the heterogeneity was explained by a single study, the heterogeneity was not explored. **Only significant associations were reported.** Prespecified analyzed factors included *study-level characteristics*, i.e. study design (retro- versus prospective), conflict of interest, type of sedation (general anaesthesia versus conscious sedation), use of fluoroscopy, EBUS, or ROSE (Rapid on-site cytological evaluation), type of sampling tools and year of publication, as well as *patient-level characteristics*, i.e. mean age, percentage of female, percentage of nodules located in upper and lower lobes, nodule diameter, distance from nodule to visceral pleura, malignancy prevalence, AFTRE scores (average fiducial target registration error) and distance from the tip of the location sensor to the centre of the nodule. The rates of safety outcomes (pneumothorax and bleedings) were obtained by adding directly the counts reported in the studies. The inverse-variance method was not used for these outcomes because the continuity correction should have been applied to most studies, yielding an overestimation of the risk of adverse events. Publication bias was explored by using Egger's test and the trim and fill method. [5] This method detects potentially missing studies for the funnel plot to be symmetric and assesses the pooled results including these missing studies. All analyses were performed using Comprehensive Meta Analysis Version 2 and S-plus 8.0 for Windows. The significance level was 0.05.

## TABLES AND FIGURES

**Table E1.** Extracted outcomes

---

Results of Electromagnetic Navigation Bronchoscopy

Total Nb of targeted nodules

Total Nb of sampled nodules (successfully accessed on multiplanar views)

Nb of malignancies (including carcinoids)

Nb of positive, definitive benign diagnoses (e.g. hamartoma, fungal infection)

Nb of benign intermediate results (diagnosis needing confirmation, e.g. chronic inflammation)

Nb of malignant intermediate results (cancer suspicion, e.g. atypical cells)

Nb of indeterminate results (e.g. normal lung tissue)

Complications

Final results after further testing

Total Nb of known final diagnoses

Nb of malignancies (including carcinoids)

Nb of benign conditions

Nb of benign intermediate results confirmed to be benign

Nb of malignant intermediate results confirmed to be malignant

---

**Table E2.** Main characteristics of selected studies (participants/nodules)

| Study                       | Beginning of inclusion | Patient selection                                                                                                                   | Participants, No (% female) | Mean age, yrs | Lung lesions, No | Prevalence of lung cancer | Mean diameter, mm | Location in lower lobe, % | Mean distance to pleura, mm |
|-----------------------------|------------------------|-------------------------------------------------------------------------------------------------------------------------------------|-----------------------------|---------------|------------------|---------------------------|-------------------|---------------------------|-----------------------------|
| <b>Becker 2005</b>          | 2003                   | PPL beyond the field of FB, regardless of lesion size                                                                               | 30 (23%)                    | 65            | 30               | 83%                       | 39.8              | 27                        | 2                           |
| <b>Hautmann 2005</b>        | 2004                   | PPL beyond the field of FB                                                                                                          | 16 (38%)                    | 63.7          | 16               | ND                        | ND                | 44                        | ND                          |
| <b>Gildea 2006</b>          | 2004                   | Referral for PPL beyond the field of FB                                                                                             | 49 (40%)                    | 67.9          | 56               | 74%                       | 22.8              | 30                        | ND                          |
| <b>Schwarz 2006</b>         | 2003                   | PPL beyond the field of FB, regardless of lesion size                                                                               | 13                          | ND            | 13               | 92%                       | 33.5              | 38                        | ND                          |
| <b>Makris 2007</b>          | 2005                   | PPL beyond the field of FB, suggestive of malignancy, after nondiagnostic or impracticable FB, TTNA and MLN-TBNA, high risk surgery | 40 (25%)                    | 60            | 40               | 85%                       | 23.5              | ND                        | 15                          |
| <b>Eberhardt 2007a</b>      | 2005                   | PPL beyond the field of FB                                                                                                          | 89 (44%)                    | 67            | 93               | 76%                       | 24                | 34                        | ND                          |
| <b>Eberhardt 2007b</b>      | 2003                   | PPL beyond the field of FB                                                                                                          | 39 (49%)                    | 55            | 39               | 74%                       | 28                | 36                        | ND                          |
| <b>Eberhardt 2007b EBUS</b> | 2003                   | PPL beyond the field of FB                                                                                                          | 40 (38%)                    | 51            | 40               | 78%                       | 24                | 45                        | ND                          |
| <b>Wilson 2007</b>          | 2005                   | PPL beyond the field of FB                                                                                                          | 222 (51%)                   | 63.1          | 271              | 57%*                      | 21                | 37                        | ND                          |
| <b>Bertoletti 2008</b>      | 2005                   | PET positive PPL beyond the field of FB, high risk surgery                                                                          | 54 (13%)                    | 67            | 54               | 78%                       | 31.2              | ND                        | 9                           |
| <b>Eberhardt 2009</b>       | 2005                   | Referral for small PPL suggestive of malignancy                                                                                     | 54 (26%)                    | 65.1          | 55               | 89%                       | 23.3              | ND                        | ND                          |
| <b>Lamprecht 2009</b>       | 2005                   | PPL beyond the field of FB and/or too small to be visible on fluoroscopy                                                            | 13 (23%)                    | 64.2          | 13               | 69%                       | 30                | 31                        | 27                          |
| <b>Seijo 2010</b>           | 2007                   | PPL. Straightforward Surgery or TTNA deemed suboptimal                                                                              | 51 (27%)                    | 62            | 51               | 72%                       | 25                | 24                        | 11                          |
| <b>Mahajan 2011</b>         | 2006                   | PPL beyond the field of FB, high risk surgery                                                                                       | 48                          | ND            | 49               | 57%                       | 20                | 33                        | ND                          |
| <b>Lamprecht 2012</b>       | 2010                   | PPL beyond the field of FB                                                                                                          | 112 (33%)                   | 66.7          | 112              | 85%                       | 27.1              | 37                        | ND                          |
| <b>Pearlstein 2012</b>      | 2008                   | PPL suggestive of malignancy based on CT and PET scan, unsuitable for TTNA, high risk surgery, no other available biopsy site       | 101 (39%)                   | 69            | 101              | 81%                       | 28                | ND                        | ND                          |

PPL: peripheral pulmonary lesion. FB: flexible bronchoscopy. ND: no data available. TTNA: transthoracic needle aspiration. MLN-TBNA: mediastinal lymph node transbronchial needle aspiration.

\* High incidence of histoplasmosis in the study population (Indiana, USA); 33% unknown final diagnoses.

**Table E3.** Main characteristics of selected studies (methods, intervention)

| Study                     | Study design  | QUADAS scores | Conflict of interest | Type of sedation | Additional technique           | AFTRE (mm) | Mean distance btw tip of sensor and center of nodule (mm) | Sampling technique            | Overall duration of exam (min, mean) |
|---------------------------|---------------|---------------|----------------------|------------------|--------------------------------|------------|-----------------------------------------------------------|-------------------------------|--------------------------------------|
| <b>Becker 2005</b>        | Prospective   | 3             | No                   | GA               | Fluoroscopy, radial probe EBUS | 6.2        | 8.4                                                       | Forceps, brush, curette       | ND                                   |
| <b>Hautmann 2005</b>      | Prospective   | 3             | ND                   | CS               | Fluoroscopy‡                   | ND         | ND                                                        | Forceps                       | ND                                   |
| <b>Gildea 2006</b>        | Prospective   | 3             | Yes                  | CS               | Fluoroscopy                    | 6.6        | 9                                                         | Forceps, brush, BAL, needle   | 51                                   |
| <b>Schwarz 2006</b>       | Prospective   | 3             | Yes                  | CS               | Fluoroscopy                    | 5.7        | ND                                                        | Forceps, brush                | 46                                   |
| <b>Eberhardt 2007a</b>    | Prospective   | 3             | Yes                  | GA/CS            | 0                              | 4.6        | 9                                                         | Forceps, brush, BALII, needle | 26.9                                 |
| <b>Eberhardt 07b</b>      | Prospective   | 3             | Yes                  | GA/CS            | 0                              | ND         | ND                                                        | Forceps                       | ND                                   |
| <b>Eberhardt 07b EBUS</b> | Prospective   | 3             | Yes                  | GA/CS            | Radial probe EBUS              | ND         | ND                                                        | Forceps                       | ND                                   |
| <b>Makris 2007</b>        | Prospective   | 4             | No                   | GA               | 0                              | 4          | 8.7                                                       | Forceps§                      | ND                                   |
| <b>Wilson 2007</b>        | Retrospective | 3             | No                   | CS               | Fluoroscopy, ROSE              | 5          | 8                                                         | Forceps, needle               | ND                                   |
| <b>Bertoletti 2008</b>    | Prospective   | 3             | ND                   | CS*              | 0                              | 4.7        | 10                                                        | Forceps, brush                | 29.5                                 |
| <b>Eberhardt 2009</b>     | Prospective   | 3             | Yes                  | GA               | 0†                             | 3.6        | 9                                                         | Forceps, suction**            | 25.7                                 |
| <b>Lamprecht 2009</b>     | Retrospective | 3             | ND                   | GA               | ROSE                           | 3.8        | 8.4                                                       | Forceps, brush, needle        | 60                                   |
| <b>Seijo 2010</b>         | Prospective   | 3             | Yes                  | CS               | ROSE                           | 4          | 8                                                         | Forceps, needle               | 56                                   |
| <b>Mahajan 2011</b>       | Retrospective | 3             | No                   | CS               | Fluoroscopy                    | ND         | ND                                                        | Forceps, brush, BAL           | ND                                   |
| <b>Lamprecht 2012</b>     | Prospective   | 4             | No                   | GA               | ROSE                           | ND         | ND                                                        | Forceps, brush, needle        | 45.2                                 |
| <b>Pearlstein 2012</b>    | Retrospective | 3             | Yes                  | GA               | ROSE                           | 4          | 7.4                                                       | Forceps, brush, needle        | 70                                   |

QUADAS: Quality Assessment of Diagnostic Accuracy Studies, cf text. AFTRE: Average Fiducial Target Registration Error. GA: general anesthesia. CS: conscious sedation. ND: no data available. BAL: bronchiolo-alveolar lavage. ROSE: rapid on-site cytological evaluation

\* 50%/50% nitrous oxide/oxygen mixture

† EBUS performed, but without additional navigation if PPL not seen on ultrasound

‡ Commercially unavailable ENB system, without any steerable catheter

§ 9 attempts for biopsies, instead of mostly 3 to 5 in other studies

II Through extended working channel

\*\* Suction of the nodule through a dedicated catheter, with back and forth moves

**Table E4.** Patient-level characteristics associated with significant modification of ENB's performance.

|                                               | <b>Outcome</b>             | <b>Regression slope</b> | <b>p-values</b> | <b>Nb of studies*</b> |
|-----------------------------------------------|----------------------------|-------------------------|-----------------|-----------------------|
| <b>Malignancy prevalence</b>                  | Diagnostic yield           | 0.025                   | 0.02            | 15                    |
|                                               | Negative predictive value  | - 0.038                 | 0.02            | 14                    |
| <b>Publication date</b>                       | Sensitivity for malignancy | 0.165                   | <0.001          | 14                    |
|                                               | Accuracy for malignancy    | 0.162                   | <0.001          | 14                    |
|                                               | Negative predictive value  | 0.164                   | 0.009           | 14                    |
| <b>Percentage of nodules in upper lobes**</b> | Sensitivity for malignancy | - 6.125                 | 0.03            | 12                    |
|                                               | Accuracy for malignancy    | - 8.010                 | 0.02            | 12                    |
|                                               | Negative predictive value  | - 8.120                 | 0.048           | 14                    |

\* With available data

\*\* Highly dependent on a single study according to sensitivity analyses

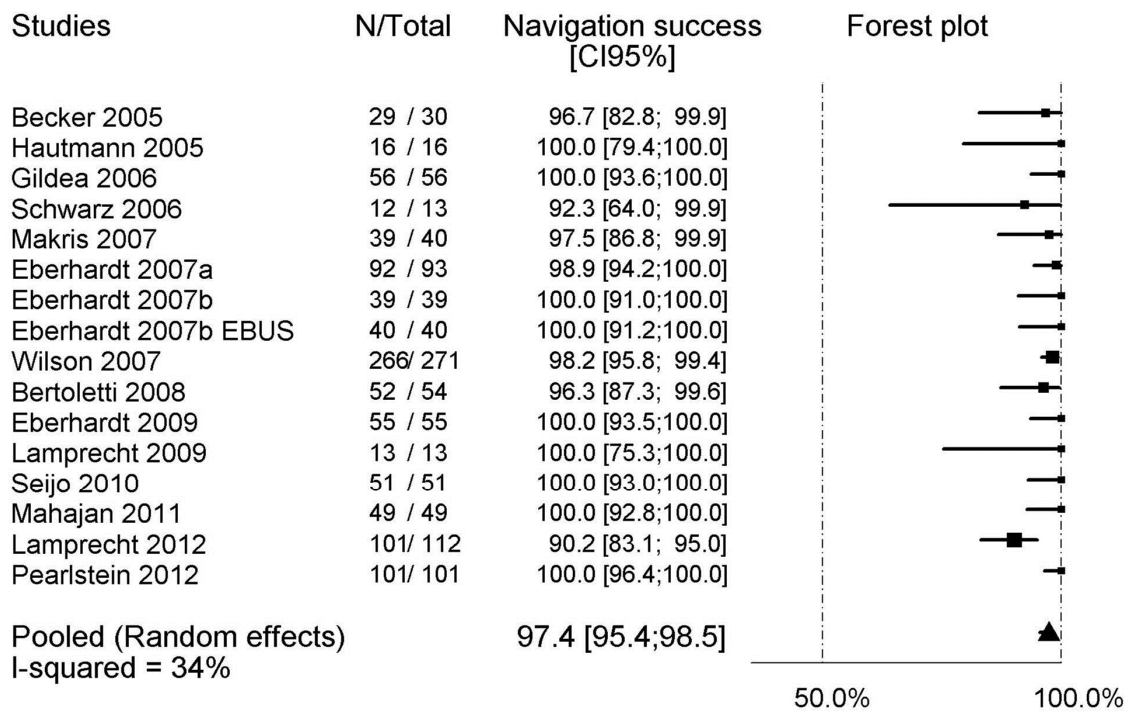

**Figure E1:** Successful navigation toward peripheral lung lesions with ENB



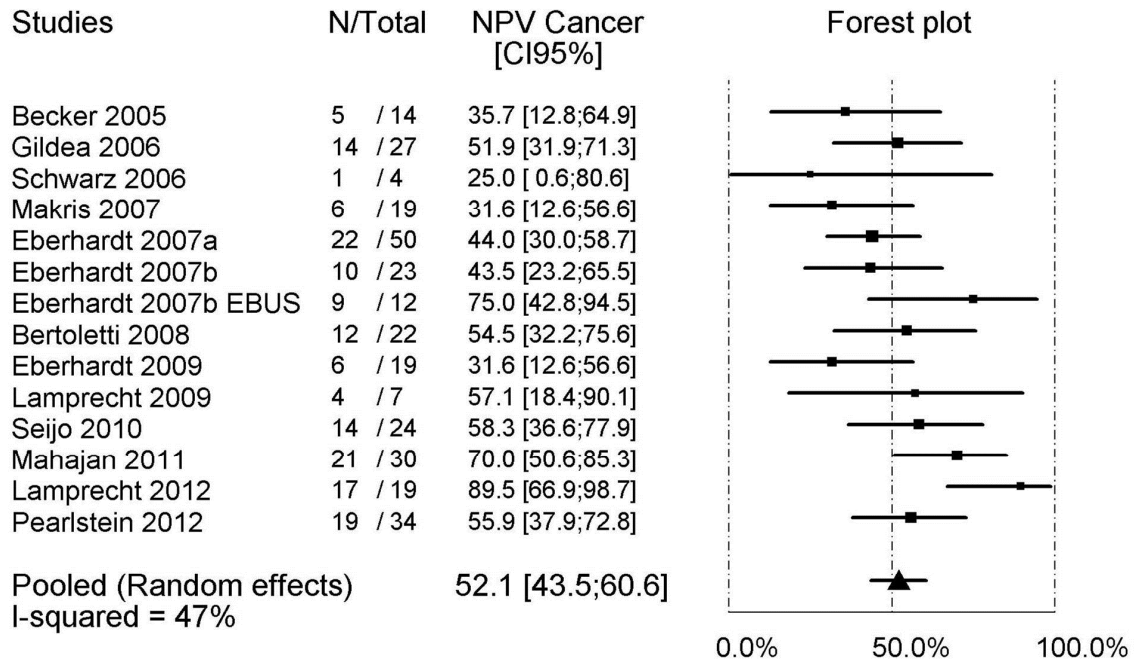

**Figure E2:** ENB's negative predictive value for malignancy

## REFERENCES

- 1 Bossuyt PM, Reitsma JB, Bruns DE, *et al.* The STARD statement for reporting studies of diagnostic accuracy: explanation and elaboration. *Clin Chem* 2003;**49**:7–18.
- 2 Devillé WL, Bezemer PD, Bouter LM. Publications on diagnostic test evaluation in family medicine journals: an optimal search strategy. *J Clin Epidemiol* 2000;**53**:65–9.
- 3 DerSimonian R, Laird N. Meta-analysis in clinical trials. *Control Clin Trials* 1986;**7**:177–88.
- 4 Higgins JPT, Thompson SG, Deeks JJ, *et al.* Measuring inconsistency in meta-analyses. *BMJ* 2003;**327**:557–60.
- 5 Duval S, Tweedie R. Trim and Fill: A Simple Funnel-Plot–Based Method of Testing and Adjusting for Publication Bias in Meta-Analysis. *Biometrics* 2000;**56**:455–63.
